# Supplementary material for: Targeting Ubiquitin-like Protein, ISG15, as a Novel Tumor Associated Antigen in Colorectal Cancer
Source: MDPI journal article supplement (doi:10.3390/cancers15041237), 2023-02-15
Supplement: s1 [file s1]

*Supplementary data*

---

**Targeting Ubiquitin-Like Protein, ISG15, as a Novel Tumor-Associated Antigen in Colorectal Cancer**

**Hong-My Nguyen, Shreyas Gaikwad, Mariam Oladejo, Wyatt Paulishak, Laurence M Wood**

Department of Immunotherapeutics and Biotechnology, Jerry H Hodge School of Pharmacy,  
Texas Tech University Health Sciences Center, Abilene, TX 79601, USA

\* Correspondence: [laurence.wood@ttuhsc.edu](mailto:laurence.wood@ttuhsc.edu); Tel.: +1-(325)-696-0431

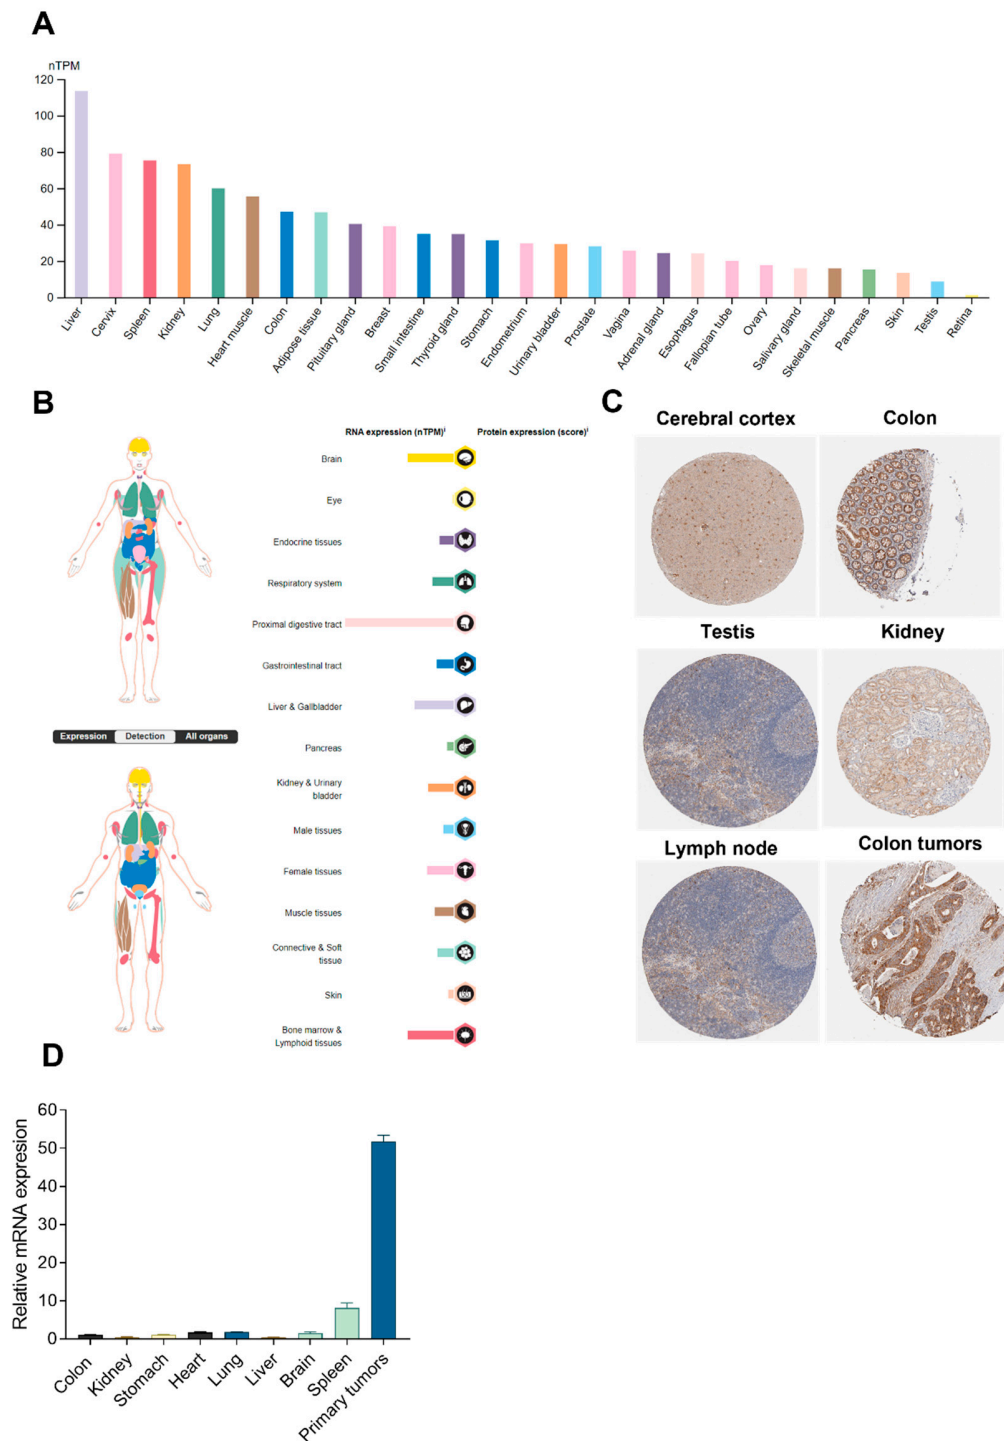

**Supplementary Figure S1.** ISG15 expression at transcriptional and translational expression. (A) Human ISG15 mRNA expression from GTEx dataset, (B) mRNA and protein expression of ISG15 in different healthy tissues, (C) Immunohistochemistry staining of ISG15 in different healthy organs and CRC tumor. (D) mRNA expression of ISG15 in different organs of C57BL/6 female mice.

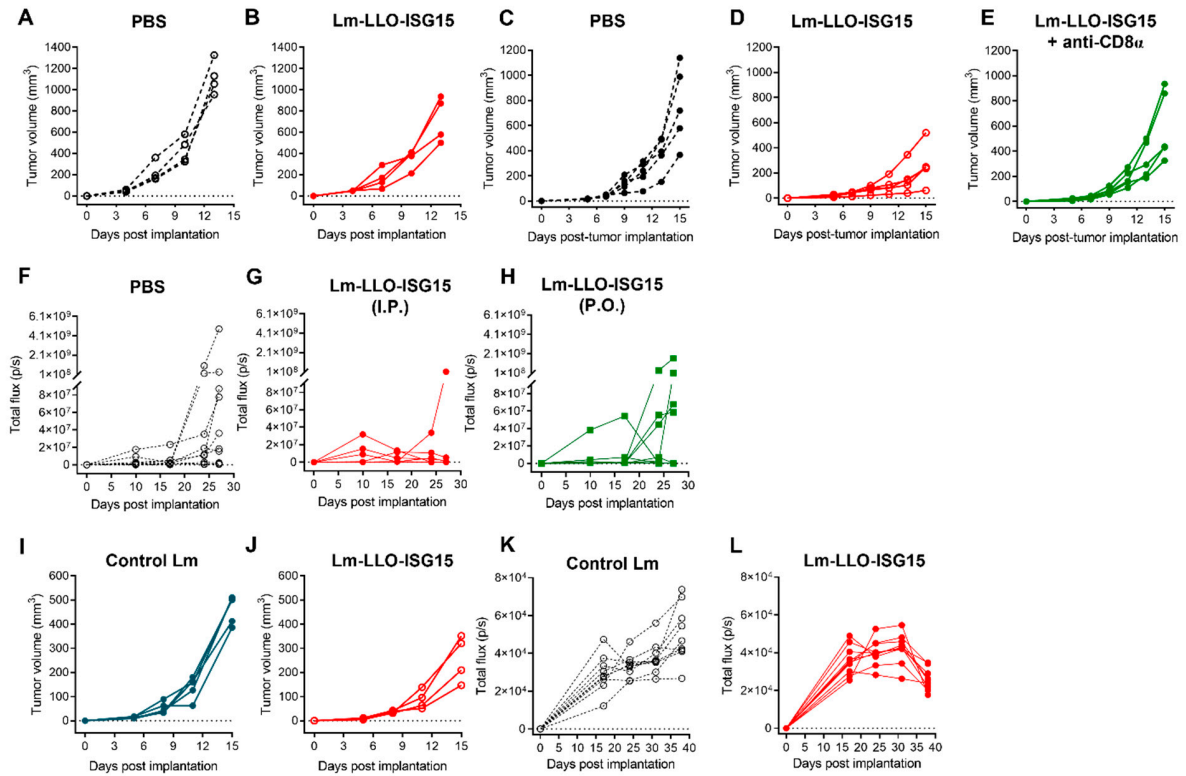

**Supplementary Figure S2.** Individual tumor growth kinetics of (A-B) experiment 3B, (C-E) experiment 3M, (F-H) experiment 4B, (I-J) experiment 5B, and (K-L) experiment 5F.

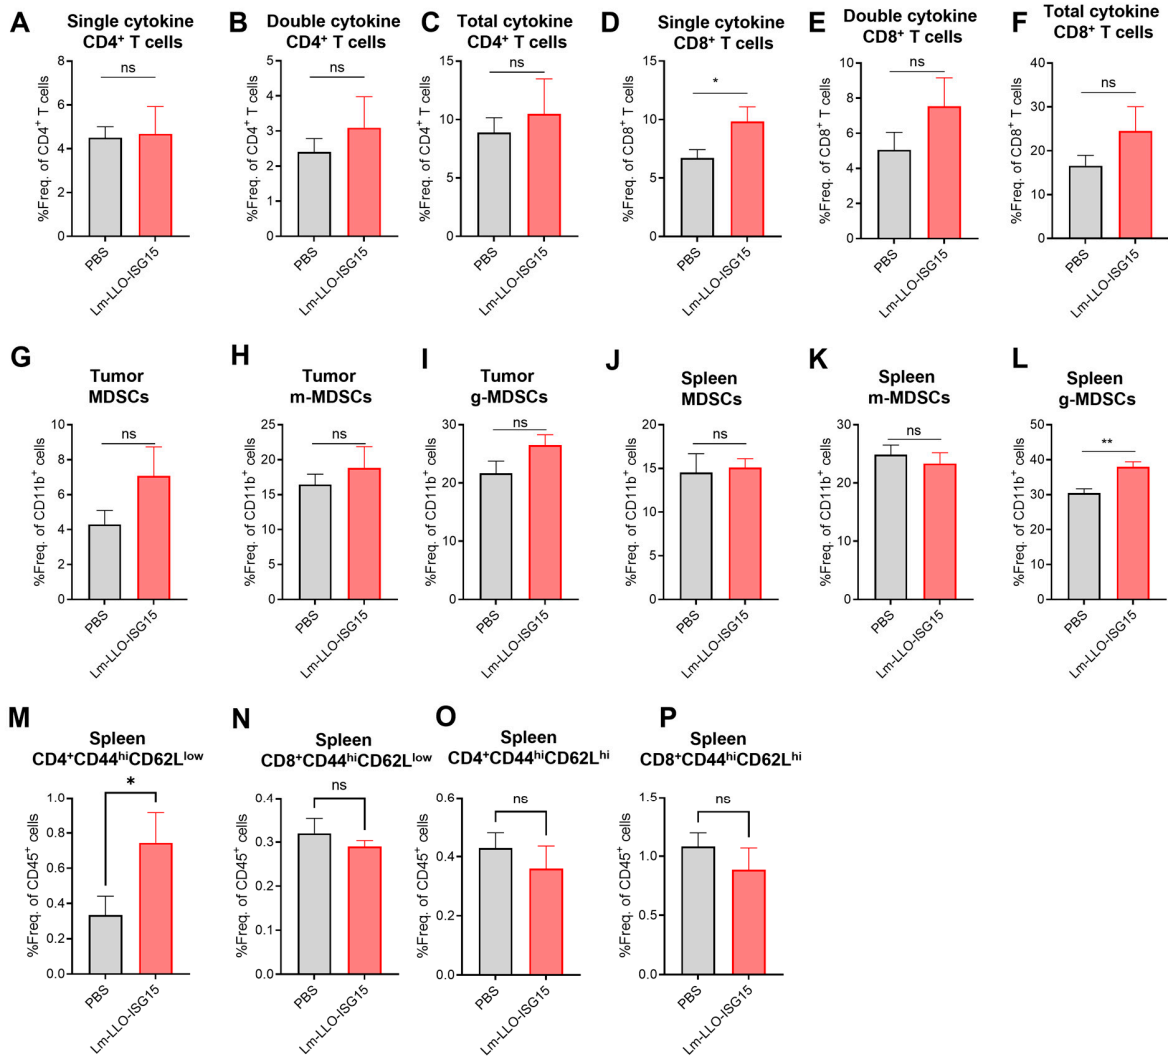

**Supplementary Figure S3.** Lm-LLO-ISC15 exerts an anti-tumor efficacy in subcutaneous CRC mouse model. Tumors and spleens from experiment 3A were harvested, dissociated to single cells, and subjected to multicolor flow cytometry as described in section Materials and methods. (A) Frequency of live CD4<sup>+</sup>IFN- $\gamma$ <sup>+</sup> and CD4<sup>+</sup>IL-2<sup>+</sup> and CD4<sup>+</sup>TNF- $\alpha$ <sup>+</sup>, (B) Frequency of live CD4<sup>+</sup>IFN- $\gamma$ <sup>+</sup>IL-2<sup>+</sup> and CD4<sup>+</sup>IL-2<sup>+</sup>TNF- $\alpha$ <sup>+</sup> and CD4<sup>+</sup>IFN- $\gamma$ <sup>+</sup>TNF- $\alpha$ <sup>+</sup>, (C) Frequency of live CD4<sup>+</sup> T cells from S1A and S1B and CD4<sup>+</sup>IFN- $\gamma$ <sup>+</sup>IL-2<sup>+</sup>TNF- $\alpha$ <sup>+</sup>, (D) Frequency of live CD8<sup>+</sup>IFN- $\gamma$ <sup>+</sup> and CD8<sup>+</sup>IL-2<sup>+</sup> and CD8<sup>+</sup>TNF- $\alpha$ <sup>+</sup>, (E) Frequency of live CD8<sup>+</sup>IFN- $\gamma$ <sup>+</sup>IL-2<sup>+</sup> and CD8<sup>+</sup>IL-2<sup>+</sup>TNF- $\alpha$ <sup>+</sup> and CD8<sup>+</sup>IFN- $\gamma$ <sup>+</sup>TNF- $\alpha$ <sup>+</sup>, (F) Frequency of live CD8<sup>+</sup> T cells from S1D and S1E and CD8<sup>+</sup>IFN- $\gamma$ <sup>+</sup>IL-2<sup>+</sup>TNF- $\alpha$ <sup>+</sup>, (G, J) Frequency of live CD11b<sup>+</sup>Gr1<sup>+</sup>, (H, K) Frequency of live CD11b<sup>+</sup>Gr1<sup>hi</sup>, (I, L) Frequency of live CD11b<sup>+</sup>Gr1<sup>int</sup>, (M) Frequency of live CD4<sup>+</sup>CD44<sup>hi</sup>CD62L<sup>low</sup>, (N) Frequency of live CD8<sup>+</sup>CD44<sup>hi</sup>CD62L<sup>low</sup>, (O) Frequency of live CD4<sup>+</sup>CD44<sup>hi</sup>CD62L<sup>hi</sup>, (P) Frequency of live CD8<sup>+</sup>CD44<sup>hi</sup>CD62L<sup>hi</sup>.

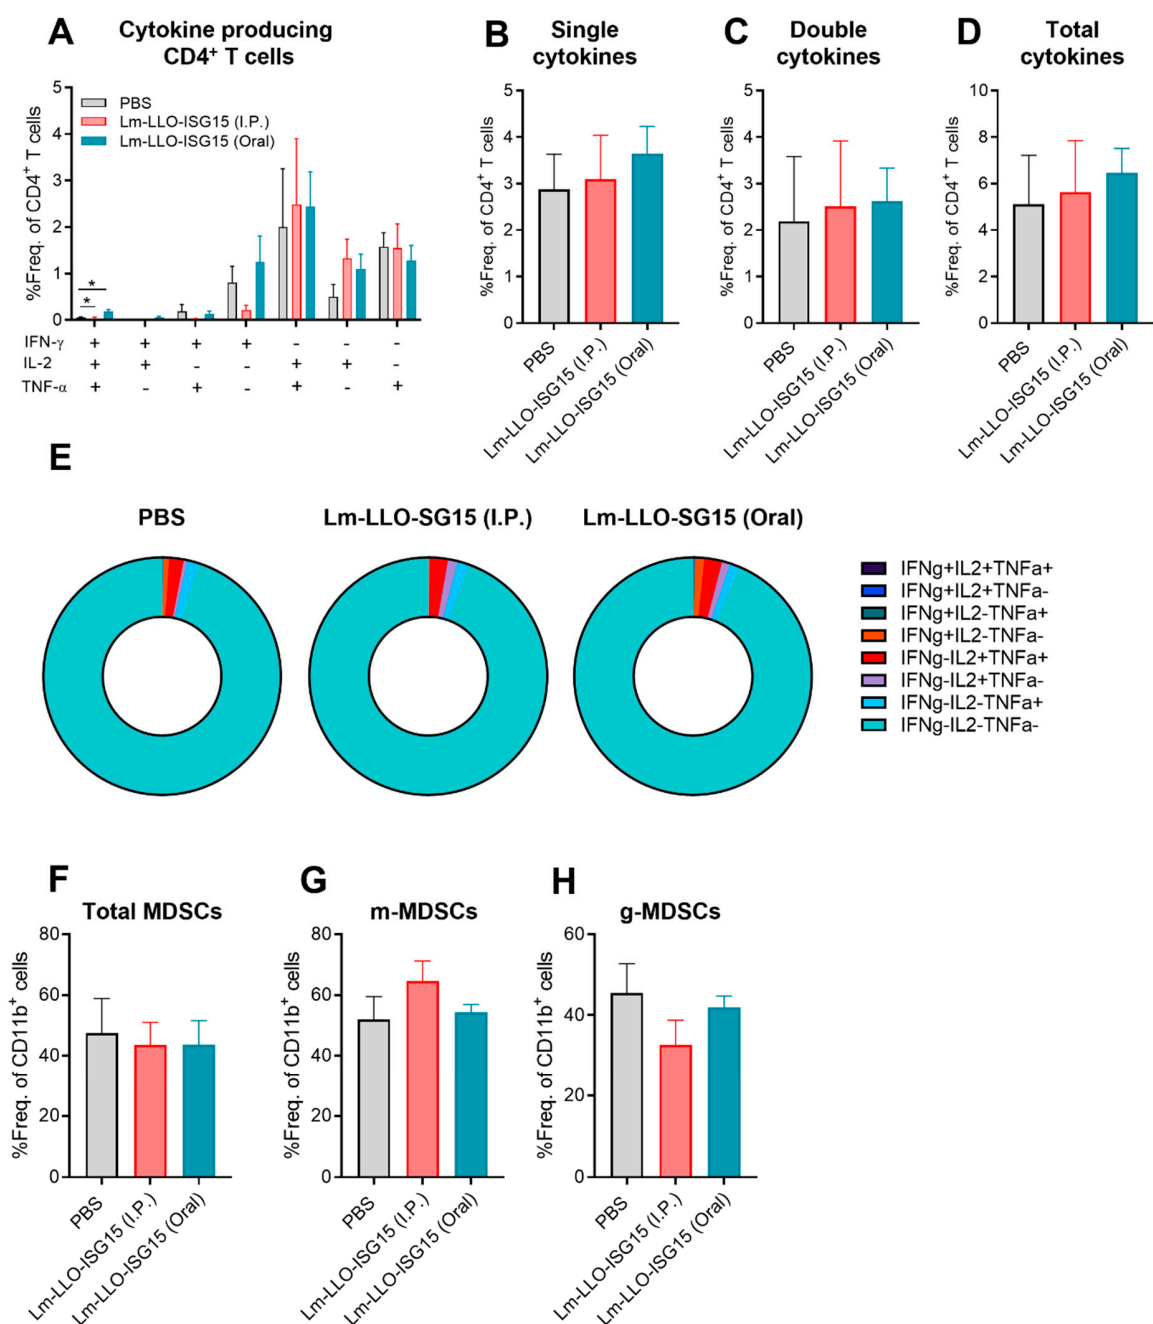

**Supplementary Figure S4.** Lm-LLO-ISG15 exerts an anti-tumor efficacy in orthotopic CRC mouse model. Tumors from experiment 4A were harvested, dissociated to single cells, and subjected to multicolor flow cytometry as described in section Materials and methods. (A, E) Distribution of multi-cytokine produced by live CD4<sup>+</sup> T cells. (B) Frequency of live CD4<sup>+</sup>IFN- $\gamma$ <sup>+</sup> and CD4<sup>+</sup>IL-2<sup>+</sup> and CD4<sup>+</sup>TNF- $\alpha$ <sup>+</sup>, (C) Frequency of live CD4<sup>+</sup>IFN- $\gamma$ <sup>+</sup>IL-2<sup>+</sup> and CD4<sup>+</sup>IL-2<sup>+</sup>TNF- $\alpha$ <sup>+</sup> and CD4<sup>+</sup>IFN- $\gamma$ <sup>+</sup>TNF- $\alpha$ <sup>+</sup>, (D) Frequency of live CD4<sup>+</sup> T cells from S2B and S2C and CD4<sup>+</sup>IFN- $\gamma$ <sup>+</sup>IL-2<sup>+</sup>TNF- $\alpha$ <sup>+</sup>, (F) Frequency of live CD11b<sup>+</sup>Gr1<sup>+</sup>, (G) Frequency of live CD11b<sup>+</sup>Gr1<sup>hi</sup>, (H) Frequency of live CD11b<sup>+</sup>Gr1<sup>int</sup>.

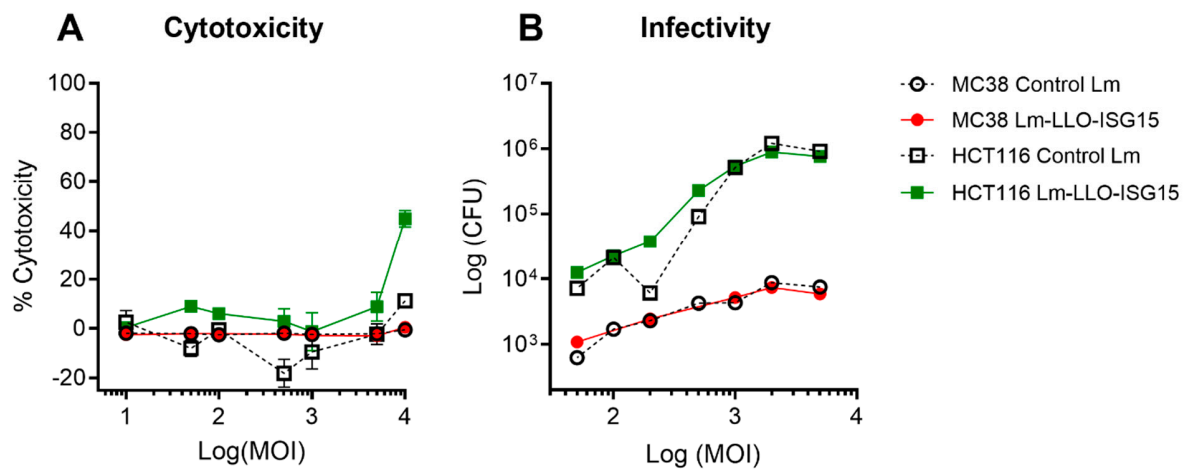

**Supplementary Figure S5.** Direct killing effect or invasive capacity of *Lm*-based vaccines. MC38 and HCT116 cells were cultured with varying MOIs of Control *Lm* or *Lm*-LLO-ISG15, and (A) Dose-response curve or (B) Infectivity rate, were determined.

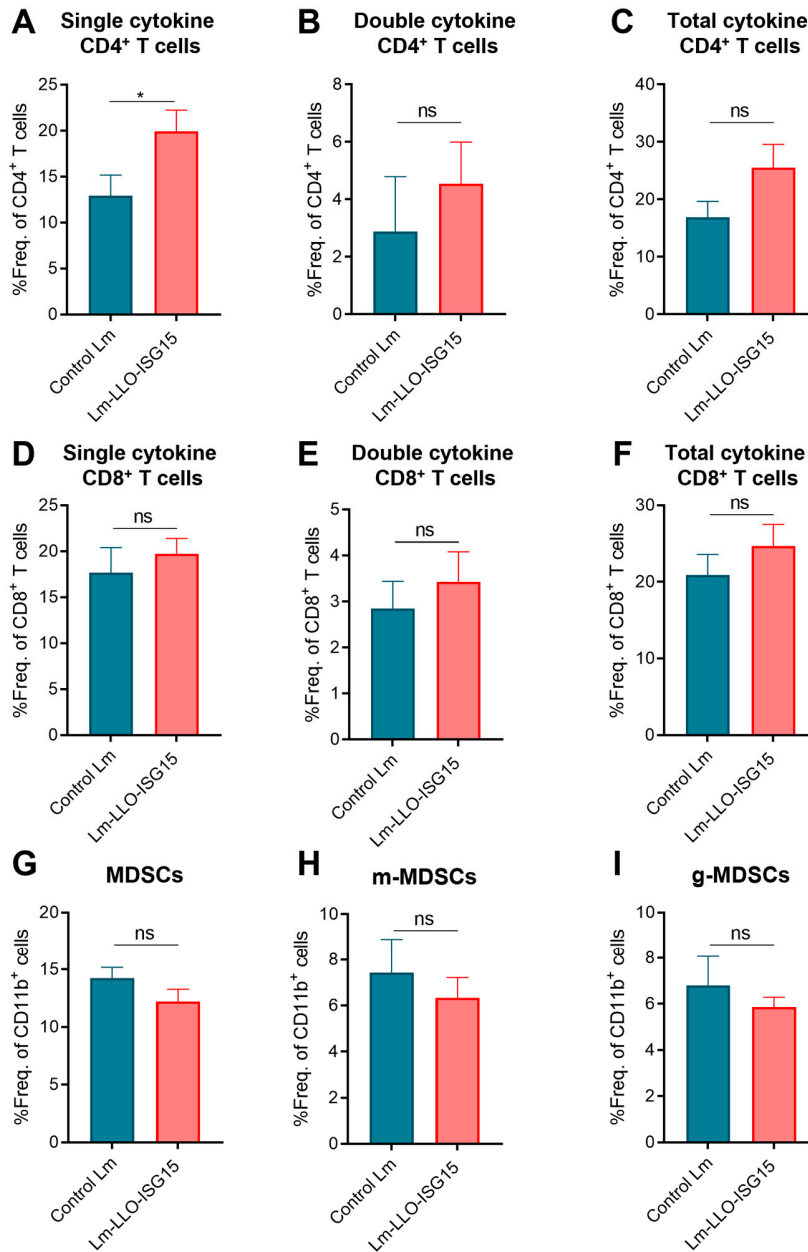

**Supplementary Figure S6.** Lm-LLO-IG15 exerts an anti-tumor efficacy in subcutaneous CRC mouse model in comparison to Control Lm. Tumors and spleens from experiment **5A** were harvested, dissociated to single cells, and subjected to multicolor flow cytometry as described in section Materials and methods. (A) Frequency of live CD4<sup>+</sup>IFN- $\gamma$ <sup>+</sup> and CD4<sup>+</sup>IL-2<sup>+</sup> and CD4<sup>+</sup>TNF- $\alpha$ <sup>+</sup>, (B) Frequency of live CD4<sup>+</sup>IFN- $\gamma$ <sup>+</sup>IL-2<sup>+</sup> and CD4<sup>+</sup>IL-2<sup>+</sup>TNF- $\alpha$ <sup>+</sup> and CD4<sup>+</sup>IFN- $\gamma$ <sup>+</sup>TNF- $\alpha$ <sup>+</sup>, (C) Frequency of live CD4<sup>+</sup> T cells from S4A and S4B and CD4<sup>+</sup>IFN- $\gamma$ <sup>+</sup>IL-2<sup>+</sup>TNF- $\alpha$ <sup>+</sup>, (D) Frequency of live CD8<sup>+</sup>IFN- $\gamma$ <sup>+</sup> and CD8<sup>+</sup>IL-2<sup>+</sup> and CD8<sup>+</sup>TNF- $\alpha$ <sup>+</sup>, (E) Frequency of live CD8<sup>+</sup>IFN- $\gamma$ <sup>+</sup>IL-2<sup>+</sup> and CD8<sup>+</sup>IL-2<sup>+</sup>TNF- $\alpha$ <sup>+</sup> and CD8<sup>+</sup>IFN- $\gamma$ <sup>+</sup>TNF- $\alpha$ <sup>+</sup>, (F) Frequency of live CD8<sup>+</sup> T cells from S4D and S4E and CD8<sup>+</sup>IFN- $\gamma$ <sup>+</sup>IL-2<sup>+</sup>TNF- $\alpha$ <sup>+</sup>, (G) Frequency of live CD11b<sup>+</sup>Gr1<sup>+</sup>, (H) Frequency of live CD11b<sup>+</sup>Gr1<sup>hi</sup>, (I) Frequency of live CD11b<sup>+</sup>Gr1<sup>int</sup>

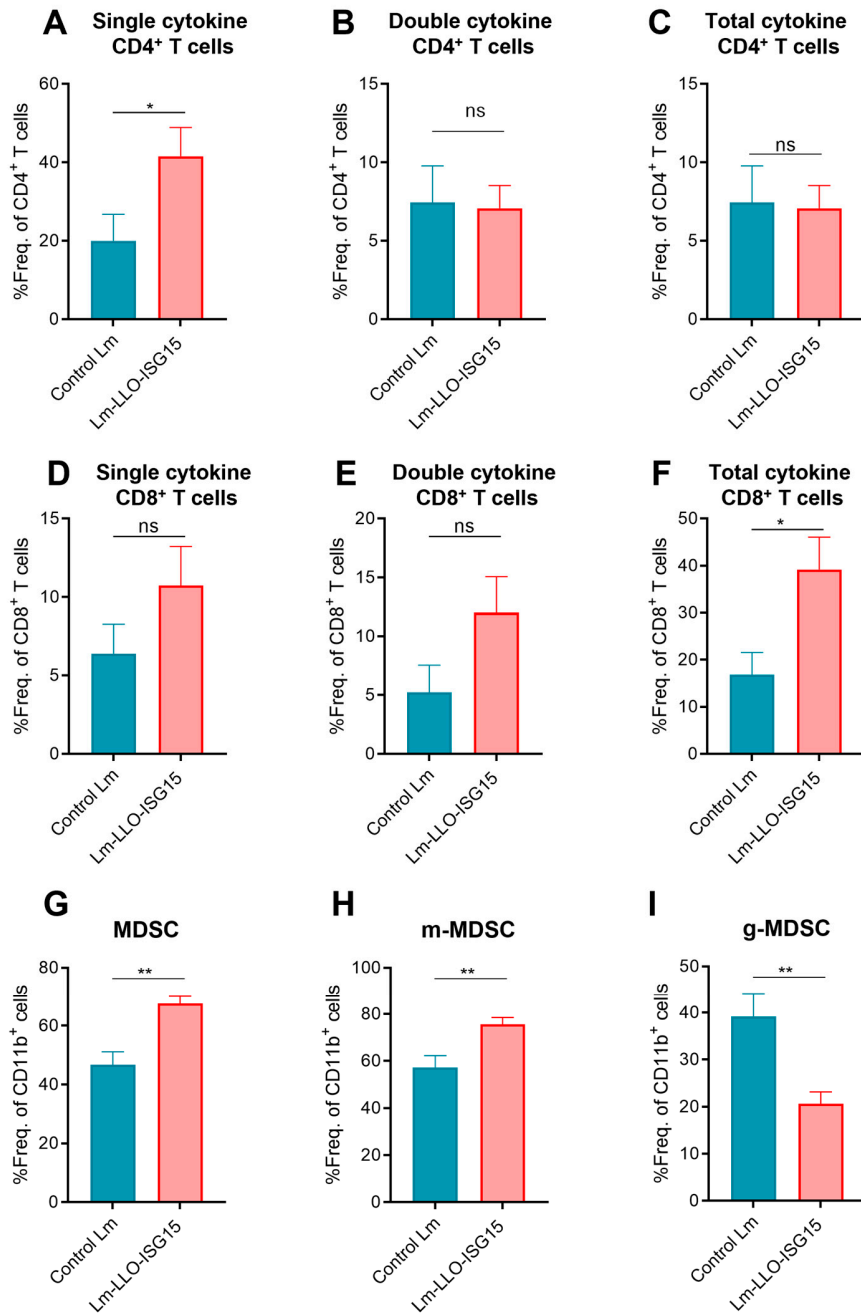

**Supplementary Figure S7.** Lm-LLO-ISG15 exerts an anti-tumor efficacy in subcutaneous CRC mouse model in comparison to Control Lm. Tumors and spleens from experiment 5E were harvested, dissociated to single cells, and subjected to multicolor flow cytometry as described in section Materials and methods. (A) Frequency of live CD4<sup>+</sup>IFN- $\gamma$ <sup>+</sup> and CD4<sup>+</sup>IL-2<sup>+</sup> and CD4<sup>+</sup>TNF- $\alpha$ <sup>+</sup>, (B) Frequency of live CD4<sup>+</sup>IFN- $\gamma$ <sup>+</sup>IL-2<sup>+</sup> and CD4<sup>+</sup>IL-2<sup>+</sup>TNF- $\alpha$ <sup>+</sup> and CD4<sup>+</sup>IFN- $\gamma$ <sup>+</sup>TNF- $\alpha$ <sup>+</sup>, (C) Frequency of live CD4<sup>+</sup> T cells from S5A and S5B and CD4<sup>+</sup>IFN- $\gamma$ <sup>+</sup>IL-2<sup>+</sup>TNF- $\alpha$ <sup>+</sup>, (D) Frequency of live CD8<sup>+</sup>IFN- $\gamma$ <sup>+</sup> and CD8<sup>+</sup>IL-2<sup>+</sup> and CD8<sup>+</sup>TNF- $\alpha$ <sup>+</sup>, (E) Frequency of live CD8<sup>+</sup>IFN- $\gamma$ <sup>+</sup>IL-2<sup>+</sup> and CD8<sup>+</sup>IL-2<sup>+</sup>TNF- $\alpha$ <sup>+</sup> and CD8<sup>+</sup>IFN- $\gamma$ <sup>+</sup>TNF- $\alpha$ <sup>+</sup>, (F) Frequency of live CD8<sup>+</sup> T cells from S5D and S5E and CD8<sup>+</sup>IFN- $\gamma$ <sup>+</sup>IL-2<sup>+</sup>TNF- $\alpha$ <sup>+</sup>, (G) Frequency of live CD11b<sup>+</sup>Gr1<sup>+</sup>, (H) Frequency of live CD11b<sup>+</sup>Gr1<sup>hi</sup>, (I) Frequency of live CD11b<sup>+</sup>Gr1<sup>int</sup>



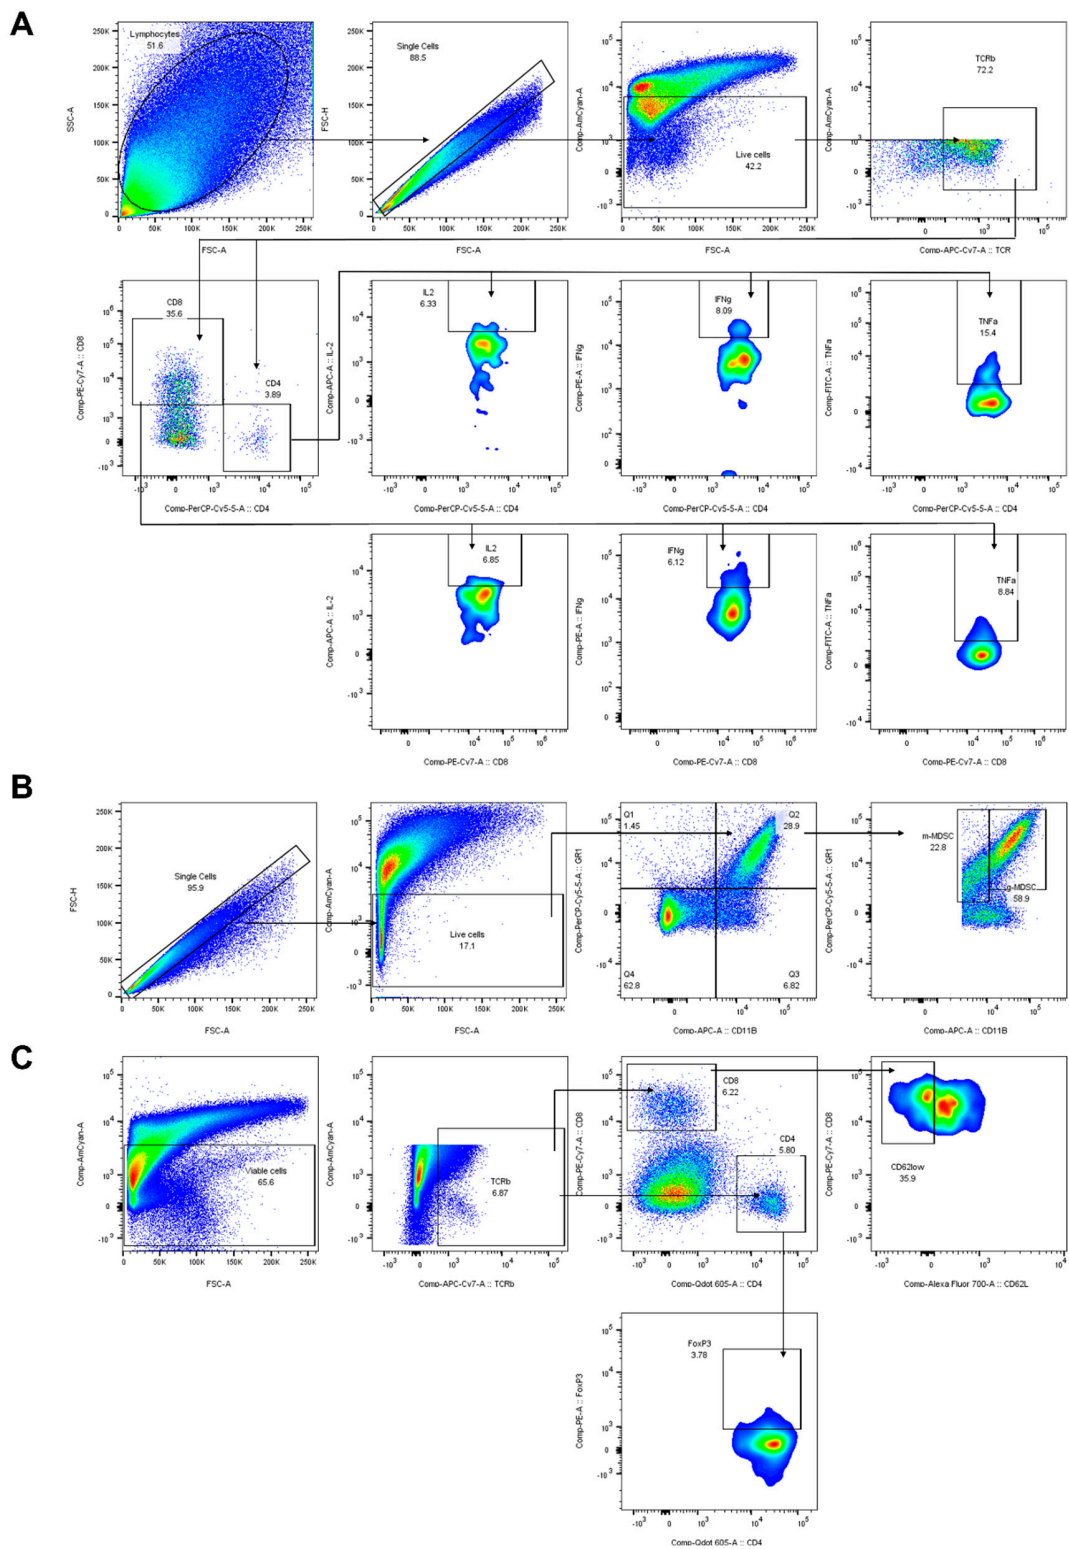

Supplementary Figure S8. Gating strategies for tumor-infiltrating lymphocytes and myeloid cells.
